# Supplementary material for: Investigations into genome diversity of Haemophilus influenzae using whole genome sequencing of clinical isolates and laboratory transformants
Source: PubMed Central journal article supplement (PMC3539920; doi:10.1186/1471-2180-12-273), 2012-11-23
Supplement: 1471-2180-12-273-S1.pdf [file 1471-2180-12-273-S1.pdf]

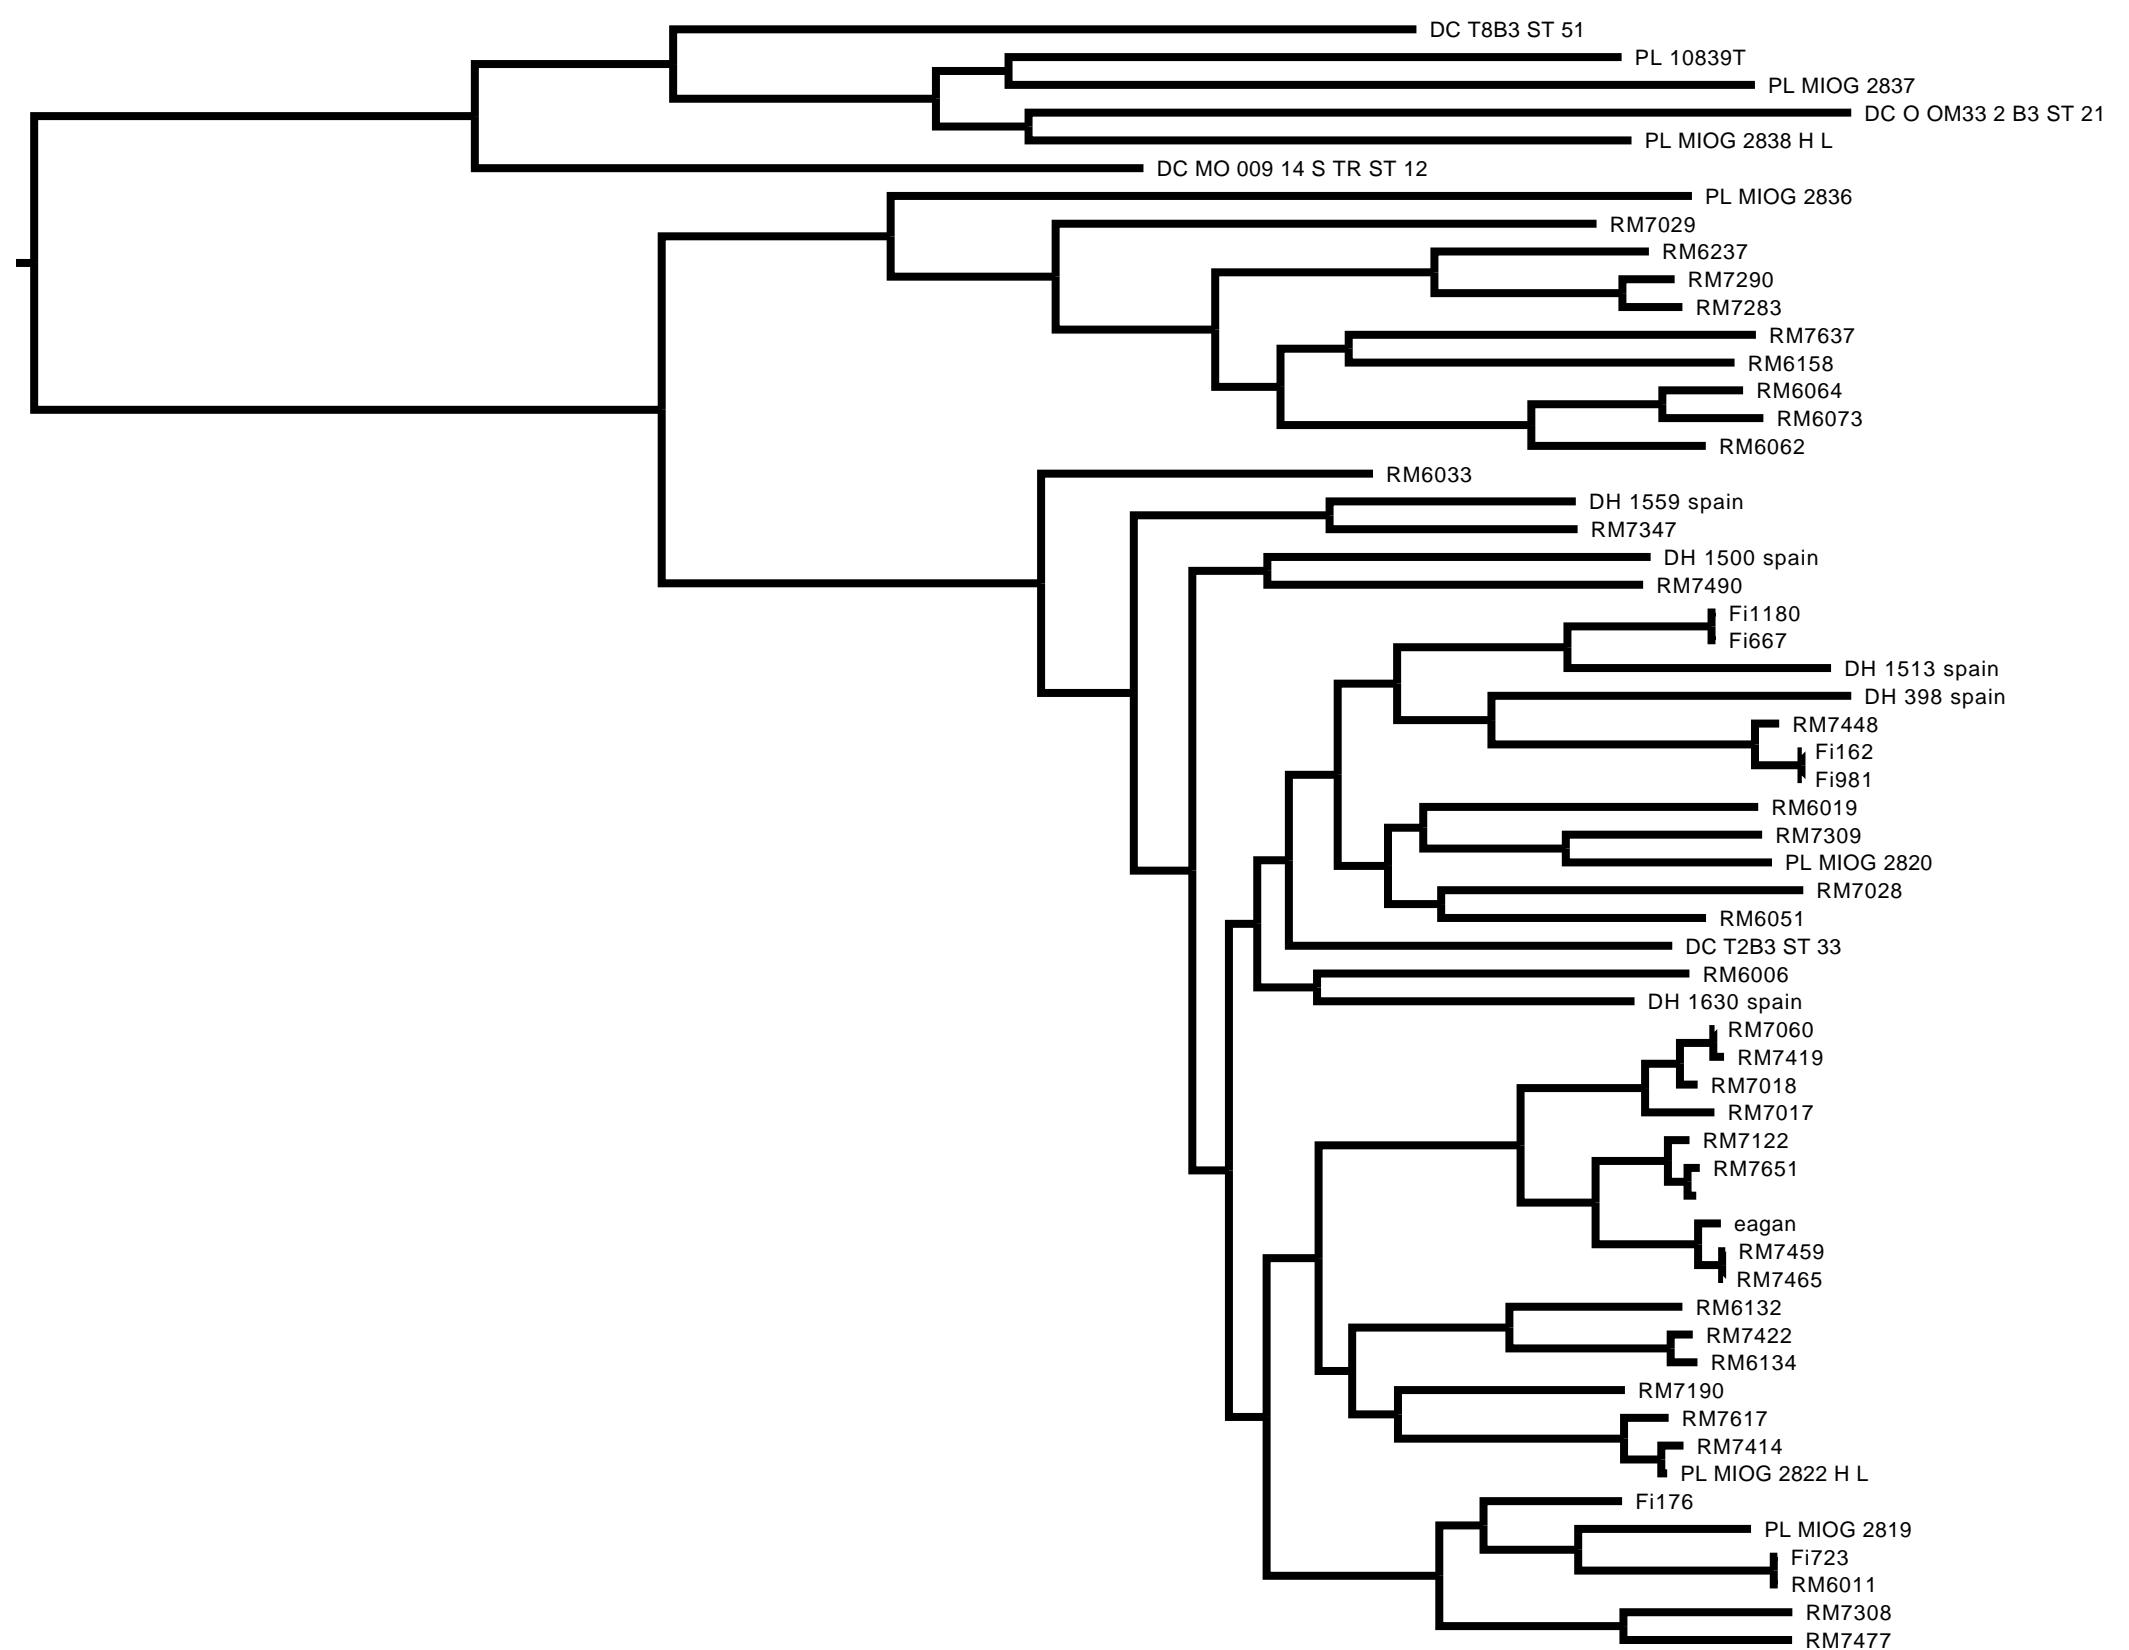

0.1
